# Supplementary material for: Heterobimetallic lanthanide–gold coordination polymers: structure and emissive properties of isomorphous [nBu4N]2[Ln(NO3)4Au(CN)2] 1-D chains
Source: Royal Society of Chemistry journal article supplement (doi:10.1039/c2dt30156c), 2012-01-01
Supplement: c2dt30156c.pdf [file c2dt30156c.pdf]

# **Supplementary Information For: Heterobimetallic Lanthanide-Gold Coordination Polymers: Structure and Emissive Properties of Isomorphous [<sup>n</sup>Bu<sub>4</sub>N]<sub>2</sub>[Ln(NO<sub>3</sub>)<sub>4</sub>Au(CN)<sub>2</sub>] 1-D Chains**

Ryan J. Roberts,<sup>†</sup> Xiaobo Li,<sup>‡</sup> Tye F. Lacey,<sup>†</sup> Zong Pan,<sup>‡</sup> Howard H. Patterson,<sup>\*,‡</sup>  
and Daniel B. Leznoff<sup>\*,†</sup>

*Department of Chemistry, Simon Fraser University, 8888 University Drive, Burnaby, British  
Columbia, V5A 1S6, Canada, and Department of Chemistry, University of Maine, Orono, ME  
04469, United States*

E-mail: howardp@maine.edu; dleznoff@sfu.ca

---

\*To whom correspondence should be addressed

<sup>†</sup>Simon Fraser University

<sup>‡</sup>University of Maine

## Infrared Spectroscopy

Table S1: Observed infrared frequency for the asymmetric and symmetric vibrational modes of  $\nu_{\text{CN}}$  stretching modes in  $[\text{Bu}_4\text{N}]_2[\text{Ln}(\text{NO}_3)_4\text{Au}(\text{CN})_2]$  ( $\text{Ln} = \text{Nd}, \text{Eu}, \text{Gd}, \text{Tb}$ ) and  $[\text{Bu}_4\text{N}][\text{Au}(\text{CN})_2] \cdot \frac{1}{2} \text{H}_2\text{O}$  compounds.

| Complex                                                                              | $\nu_{\text{CN}} (\text{cm}^{-1})$ |           |
|--------------------------------------------------------------------------------------|------------------------------------|-----------|
|                                                                                      | Asymmetric                         | Symmetric |
| $[\text{Bu}_4\text{N}][\text{Au}(\text{CN})_2] \cdot \frac{1}{2} \text{H}_2\text{O}$ | 2145                               | 2104      |
| Nd - <b>1</b>                                                                        | 2180                               | 2150      |
| Eu - <b>2</b>                                                                        | 2182                               | 2141      |
| Gd - <b>3</b>                                                                        | 2183                               | 2153      |
| Tb - <b>4</b>                                                                        | 2184                               | 2143      |

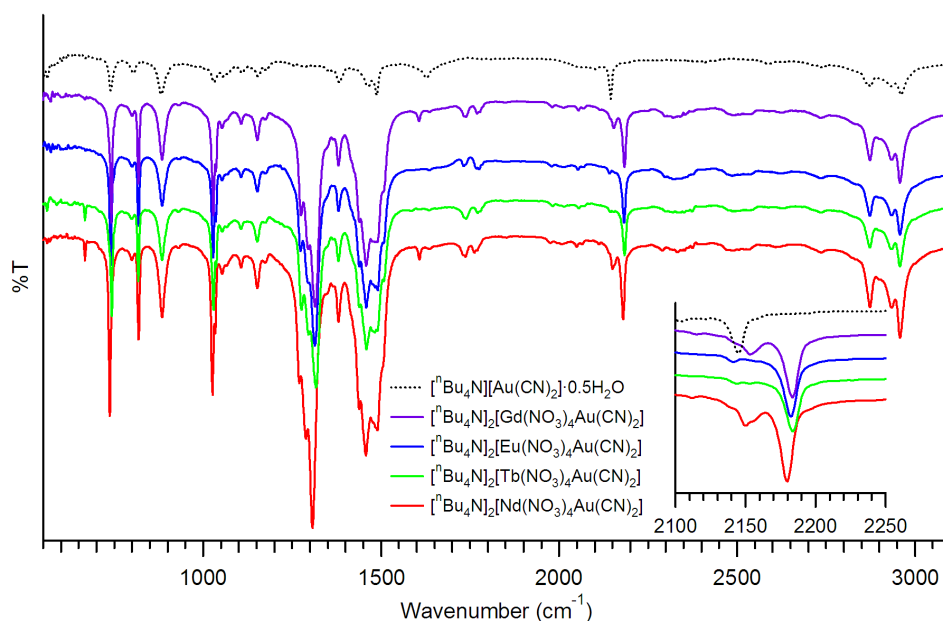

Figure S1: Infrared spectra of  $[\text{Bu}_4\text{N}]_2[\text{Ln}(\text{NO}_3)_4\text{Au}(\text{CN})_2]$  ( $\text{Ln} = \text{Nd}, \text{Eu}, \text{Gd}, \text{Tb}$ ) compounds and of  $[\text{Bu}_4\text{N}][\text{Au}(\text{CN})_2] \cdot \frac{1}{2} \text{H}_2\text{O}$ . Close-up of the  $\nu_{\text{CN}}$  stretching spectral region (2100 - 2250  $\text{cm}^{-1}$ ) is shown in the inset.
